# Supplementary material for: Free-standing graphene-based porous carbon films with three-dimensional hierarchical architecture for advanced flexible Li–sulfur batteries
Source: Royal Society of Chemistry journal article supplement (doi:10.1039/c5ta00343a), 2015-01-01
Supplement: c5ta00343a1.pdf [file c5ta00343a1.pdf]

## Supporting Information

### **Free-Standing Graphene-based Porous Carbon Films with Three-Dimensional Hierarchical Architecture for Advanced Flexible Lithium-Sulfur Batteries**

*Chao Wu<sup>b</sup>, Lijun Fu<sup>b</sup>, Joachim Maier<sup>b</sup>, and Yan Yu<sup>a,b,\*</sup>*

<sup>a</sup> Key Laboratory of Materials for Energy Conversion, Chinese Academy of Sciences, Department of Materials Science and Engineering, University of Science and Technology of China, Hefei, Anhui, 230026, China  
E-mail: [yanyumse@ustc.edu.cn](mailto:yanyumse@ustc.edu.cn)

<sup>b</sup> Max Planck Institute for Solid State Research, Heisenbergstr.1, Stuttgart 70569, Germany

Keywords: Graphene, Porous carbon, Free-standing films, Hierarchical architecture, Lithium-sulfur batteries.

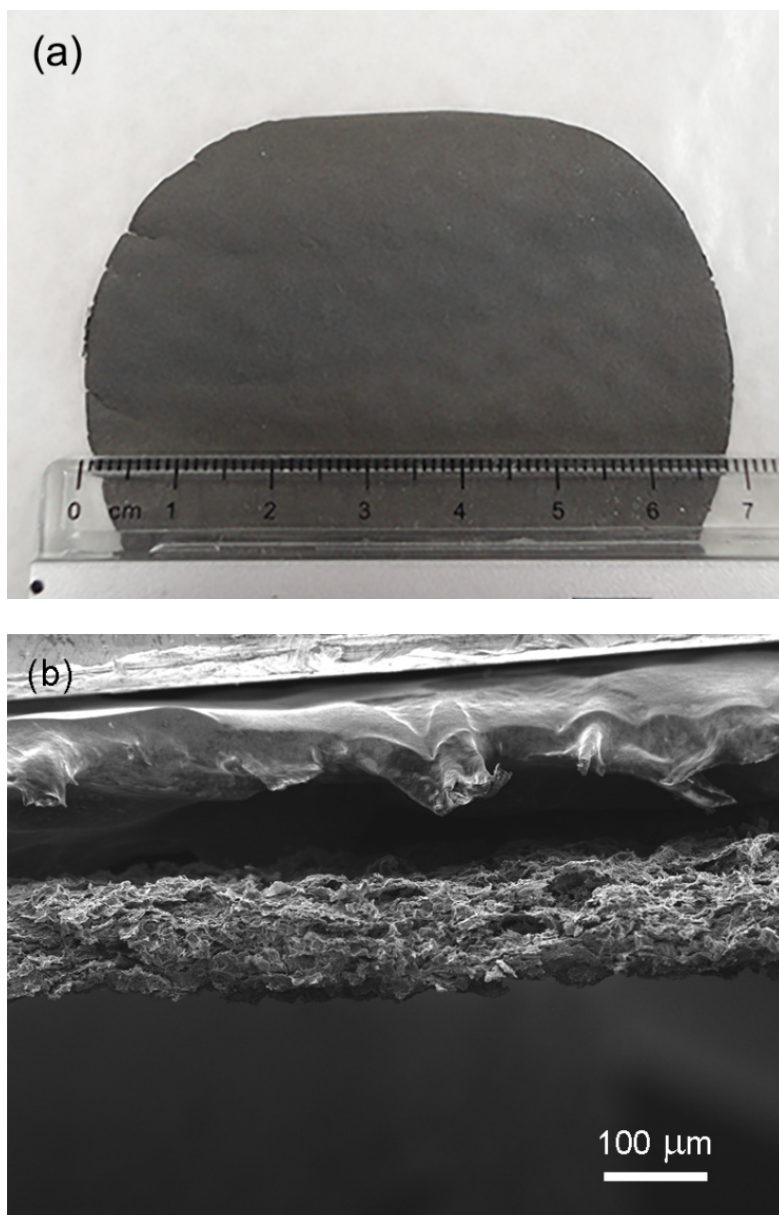

**Figure S1.** (a) Optical and (b) SEM photographs of free-standing GPC-sulfur films.

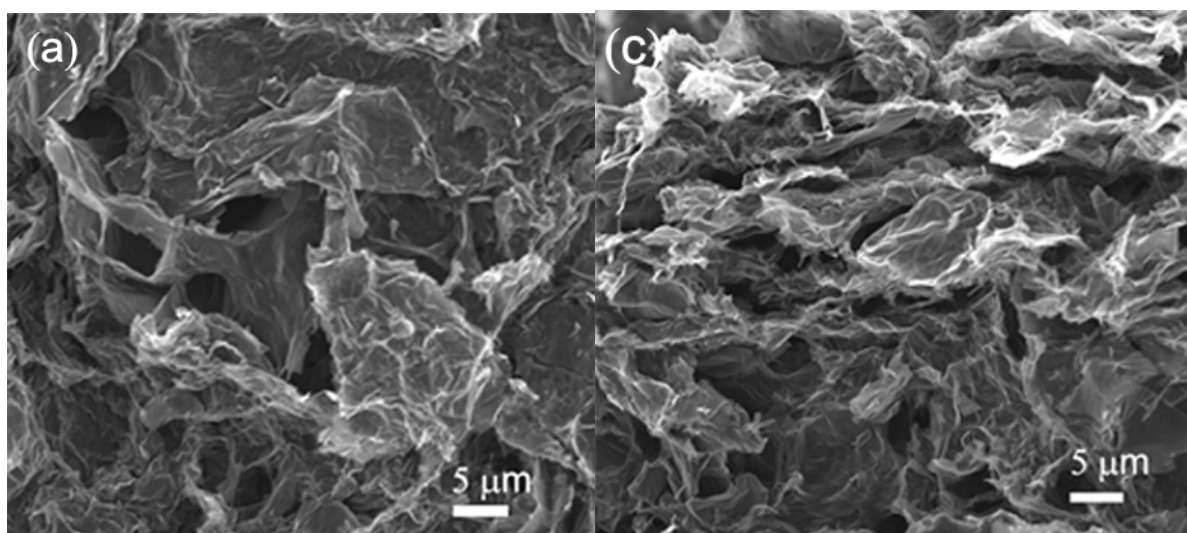

**Figure S2.** (a) Top-view and (b) cross-sectional magnified images of GPC-sulfur films.

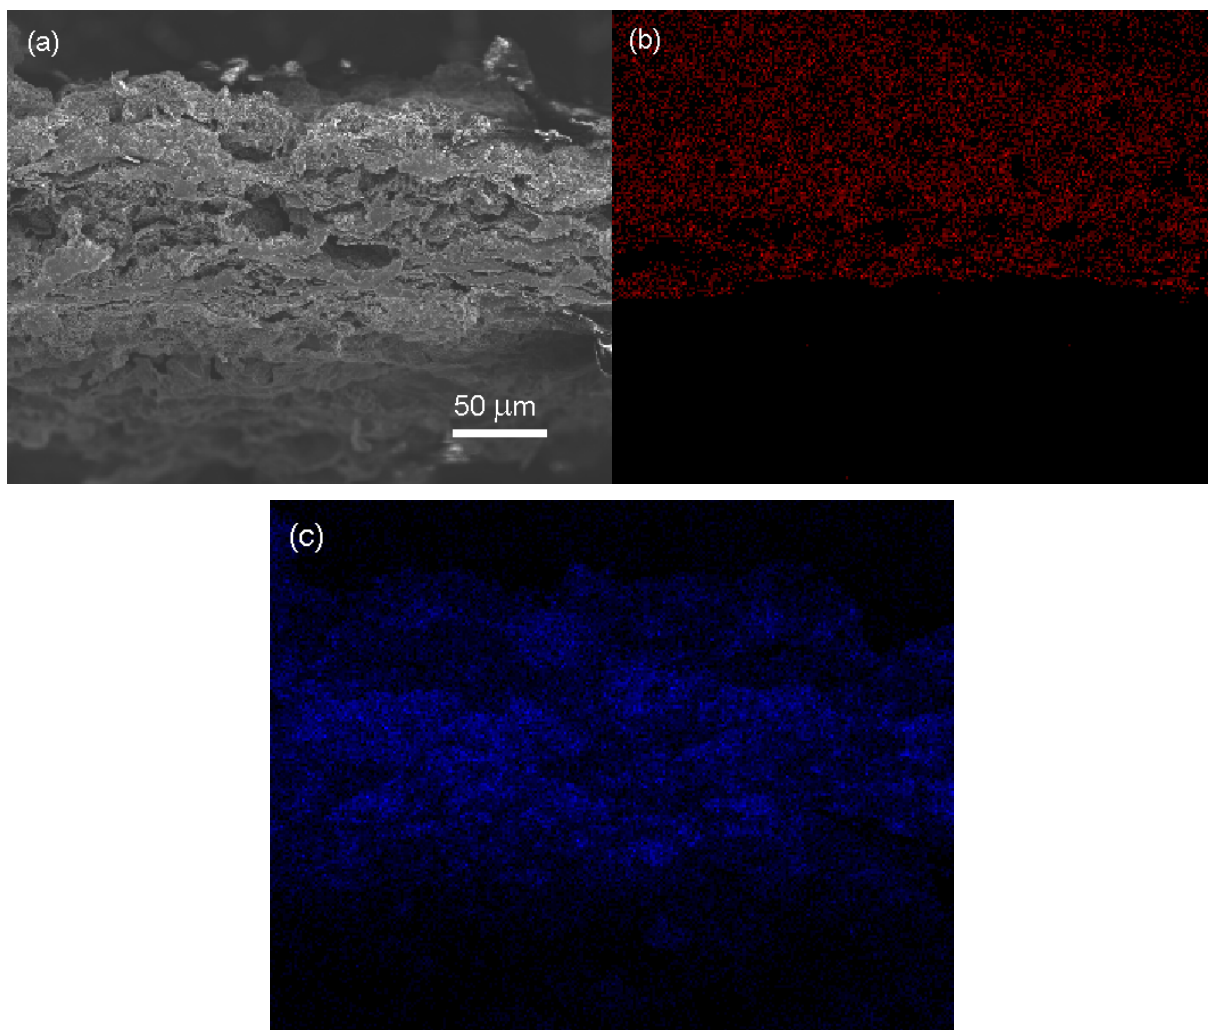

**Figure S3.** (a) SEM image of GPC-sulfur films and their elemental maps of (b) carbon and (c) sulfur.

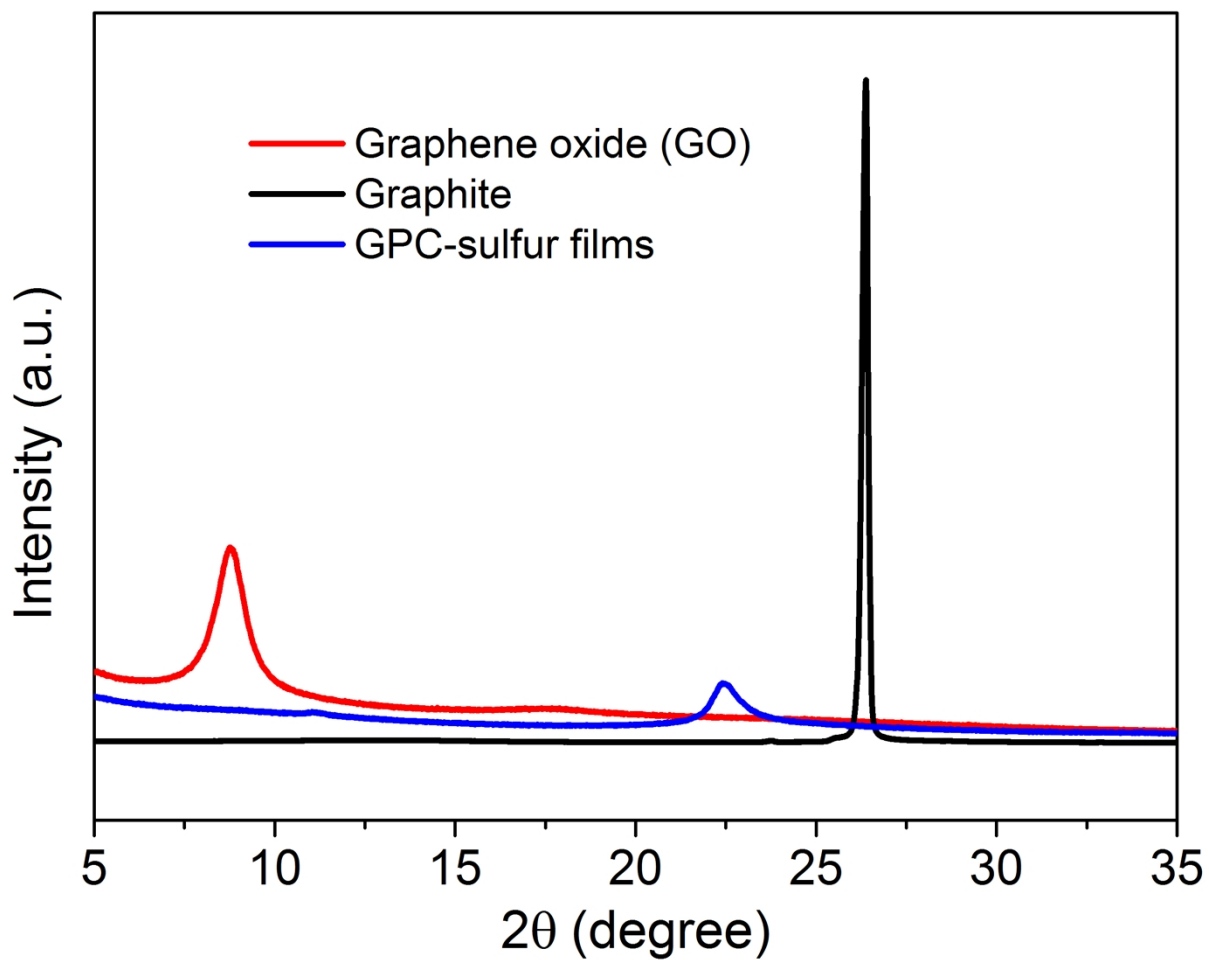

**Figure S4.** XRD patterns of graphite, GO, and GPC-sulfur films.

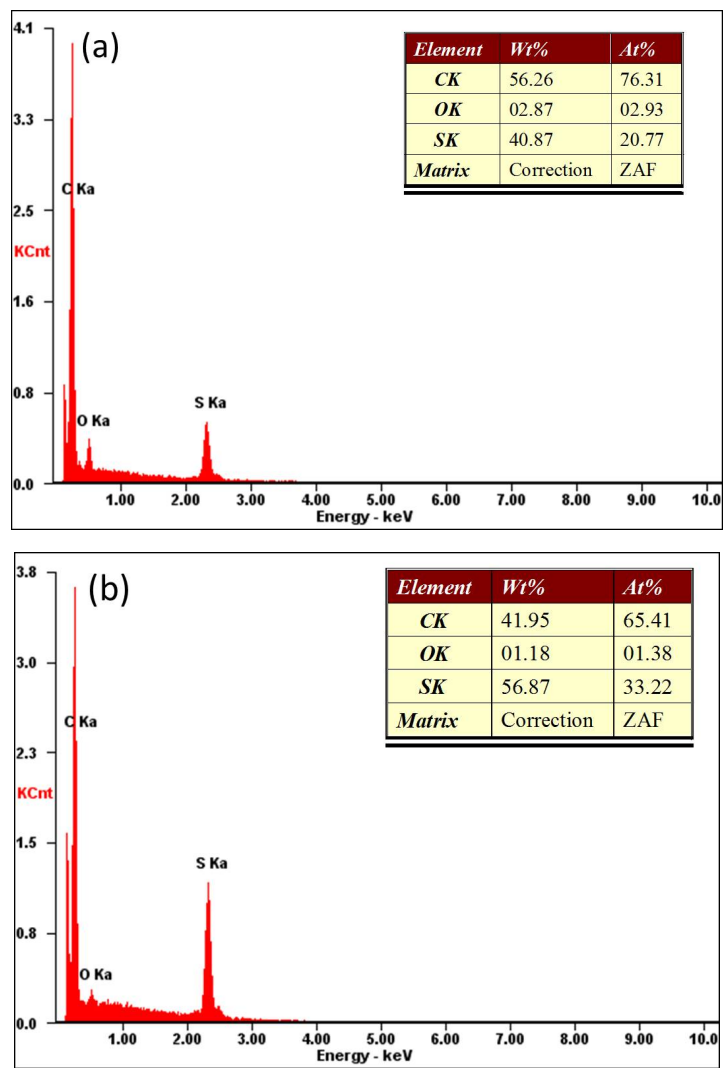

Figure S5. EDX patterns of GPC films with 41 and 57 wt% sulfur.

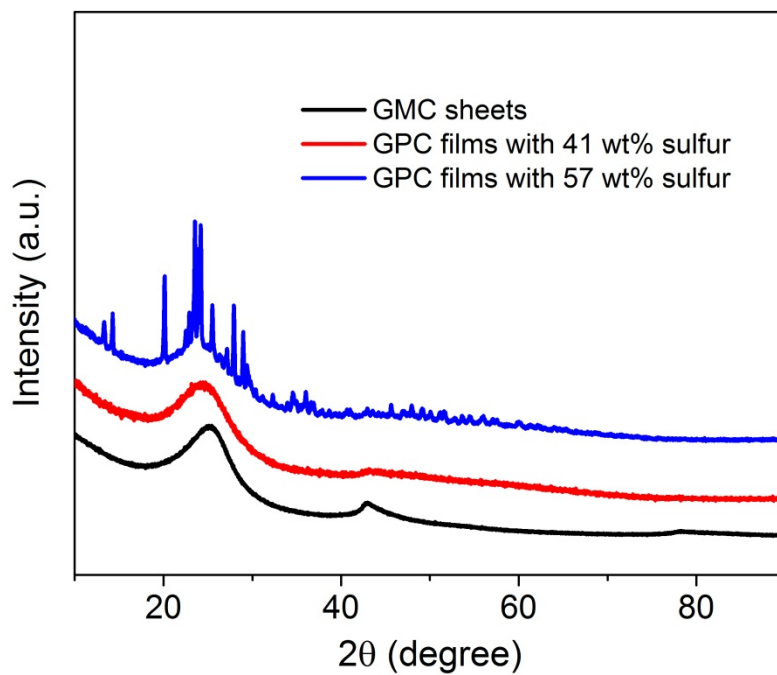

**Figure S6.** XRD patterns of GMC sheets; GPC films with 41 and 57 wt%.

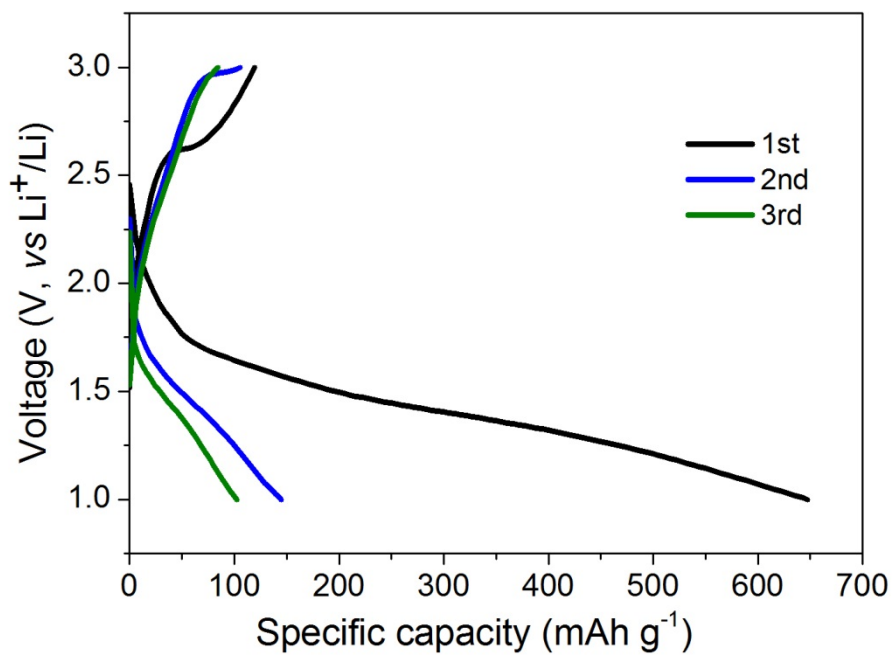

**Figure S7.** The discharge-charge voltage profiles of GPC films without sulfur at 0.2C.

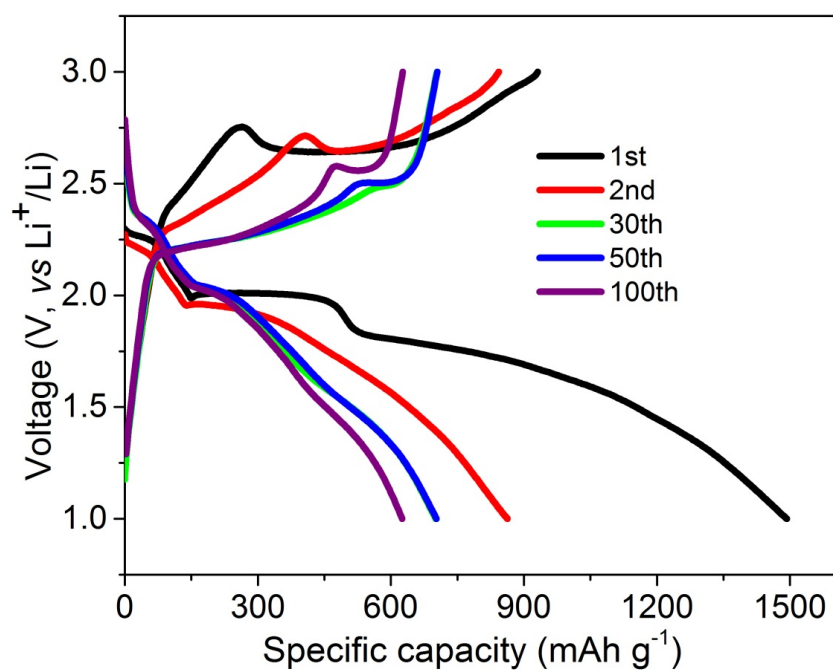

**Figure S8.** The discharge-charge voltage profiles of GPC films with 57 wt% sulfur at 0.2C.

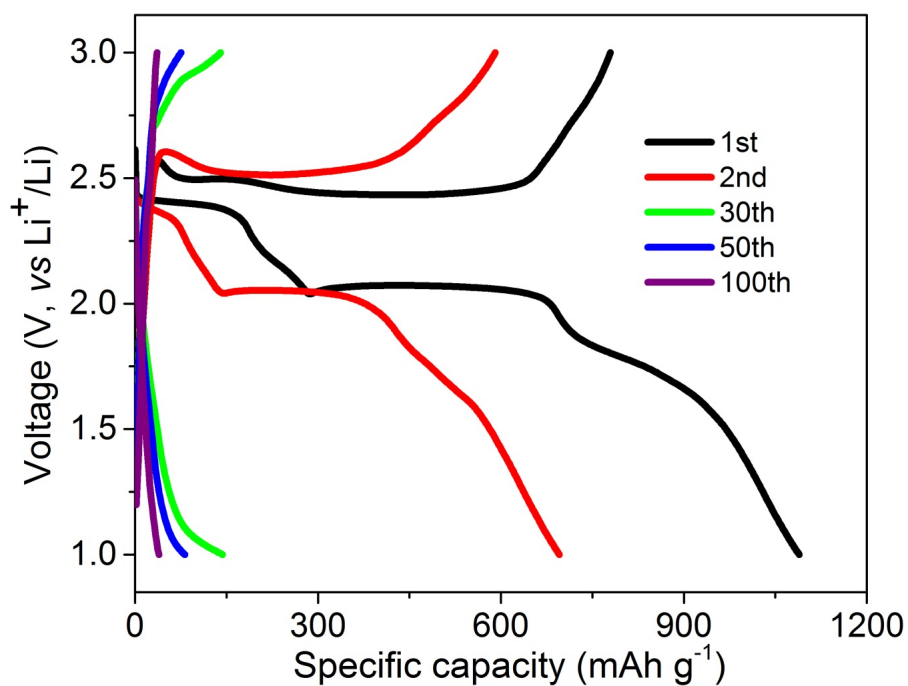

**Figure S9.** The discharge-charge voltage profiles of graphene-based films with 52 wt% sulfur at 0.2C.
